# Supplementary material for: Laser-Synthesized Elemental Boron Nanoparticles for Efficient Boron Neutron Capture Therapy
Source: MDPI journal article supplement (doi:10.3390/ijms242317088), 2023-12-04
Supplement: s1 [file s1]

# Supplementary Materials

## Laser-synthesized elemental boron nanoparticles for efficient boron neutron capture therapy

Irina N. Zavestovskaya, Anna I. Kasatova, Dmitry A. Kasatov, Julia S. Babkova, Ivan V. Zelepukin, Ksenya S. Kuzmina, Gleb V. Tikhonowski, Andrei I. Pastukhov, Kuder O. Aiyyzhy, Ekaterina V. Barmina, Anton A. Popov, Ivan A. Razumov, Evgenii L. Zavjalov, Maria S. Grigoryeva, Sergey M. Klimentov, Vladimir A. Ryabov, Sergey M. Deyev, Sergey Yu. Taskaev, and Andrei V. Kabashin

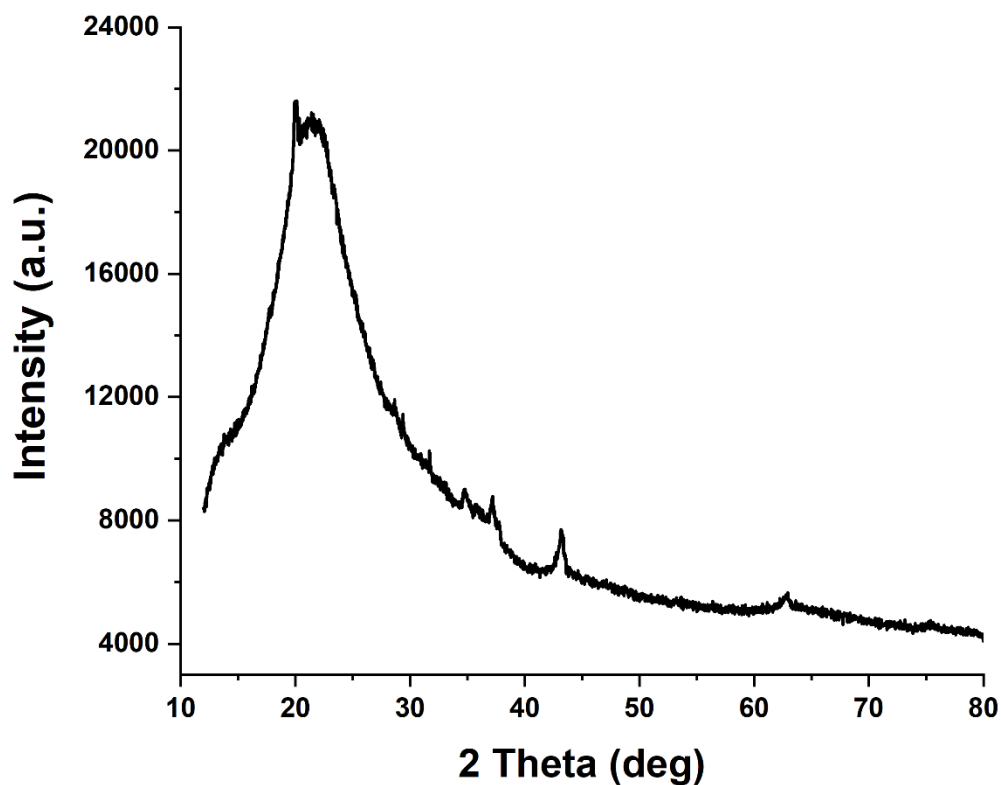

**Figure S1.** X-Ray diffraction pattern for the powder of a-BNPs, obtained by ns laser ablation.

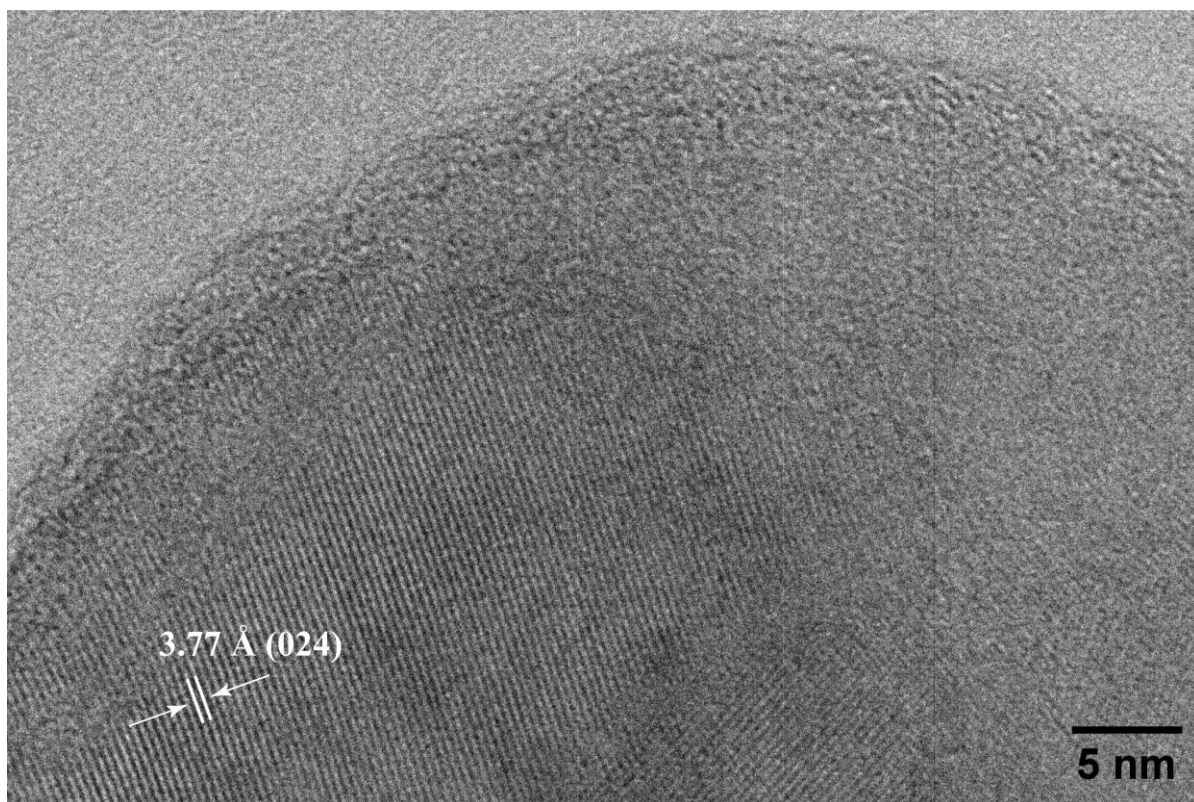

**Figure S2.** HR-TEM image of partial crystalline pc-BNPS, obtained by fs laser ablation. Scale bar - 5 nm.
